# Supplementary material for: Evaluation of Alginate Hydrogel Microstrands for Stromal Cell Encapsulation and Maintenance
Source: MDPI journal article supplement (doi:10.3390/bioengineering11040375), 2024-04-13
Supplement: s1 [file s1]

---

# Evaluation of Alginate Hydrogel Microstrands for Stromal Cell Encapsulation and Maintenance

## Supplementary Materials

### *Scanning electron microscopy (SEM) of alginate hydrogel microstrands*

Alginate hydrogel microstrands were either air dried at room temperature overnight or vacuum-dried using the FreeZone Plus 2.5L -84C Cascade Benchtop Freeze Dryer System (Labconco, Kansas City, MO, USA) at -83°C under 6 Pa overnight. Samples were mounted onto SEM specimen stubs with carbon tape and sputter coated with iridium-palladium. SEM images were taken using a Zeiss Leo 1550 field emission scanning electron microscope (Zeiss Leo Electron Microscopy Ltd., Cambridge, UK) at 3.00 kV.

## Supplemental Figure S1–S7

**Supplemental Movie S1.** Cell distribution of  $1 \times 10^7$  NIH 3T3 fibroblasts per milliliter alginate hydrogel microstrands reconstructed from Z-stacked fluorescent images of LIVE/DEAD assay on day 4.

**Supplemental Movie S2.** Cell distribution of primary E16 mesenchyme cells per milliliter alginate hydrogel microstrands reconstructed from Z-stacked fluorescent images of LIVE/DEAD assay on day 4.

---

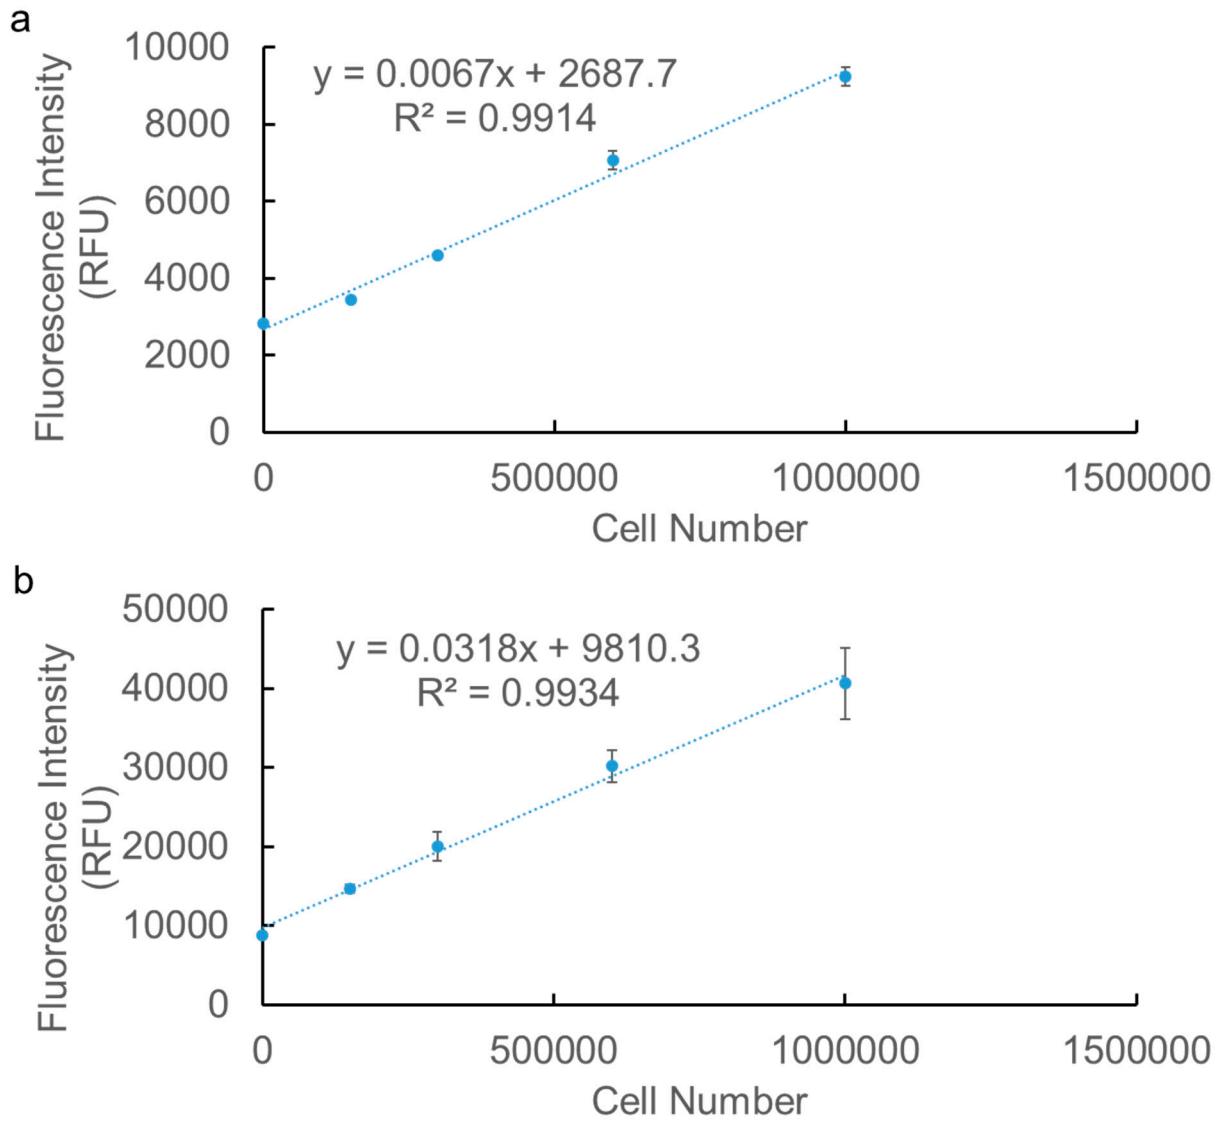

**Figure S1.** alamarBlue standard curve for NIH 3T3 fibroblasts in alginate hydrogel microstrands with different amounts of alamarBlue reagent. (a) Adding 120  $\mu$ L alamarBlue dye to cell-containing microstrands in 6 mL medium (2%). (b) Adding 600  $\mu$ L alamarBlue dye to cell-containing microstrands in 6 mL medium (10%).

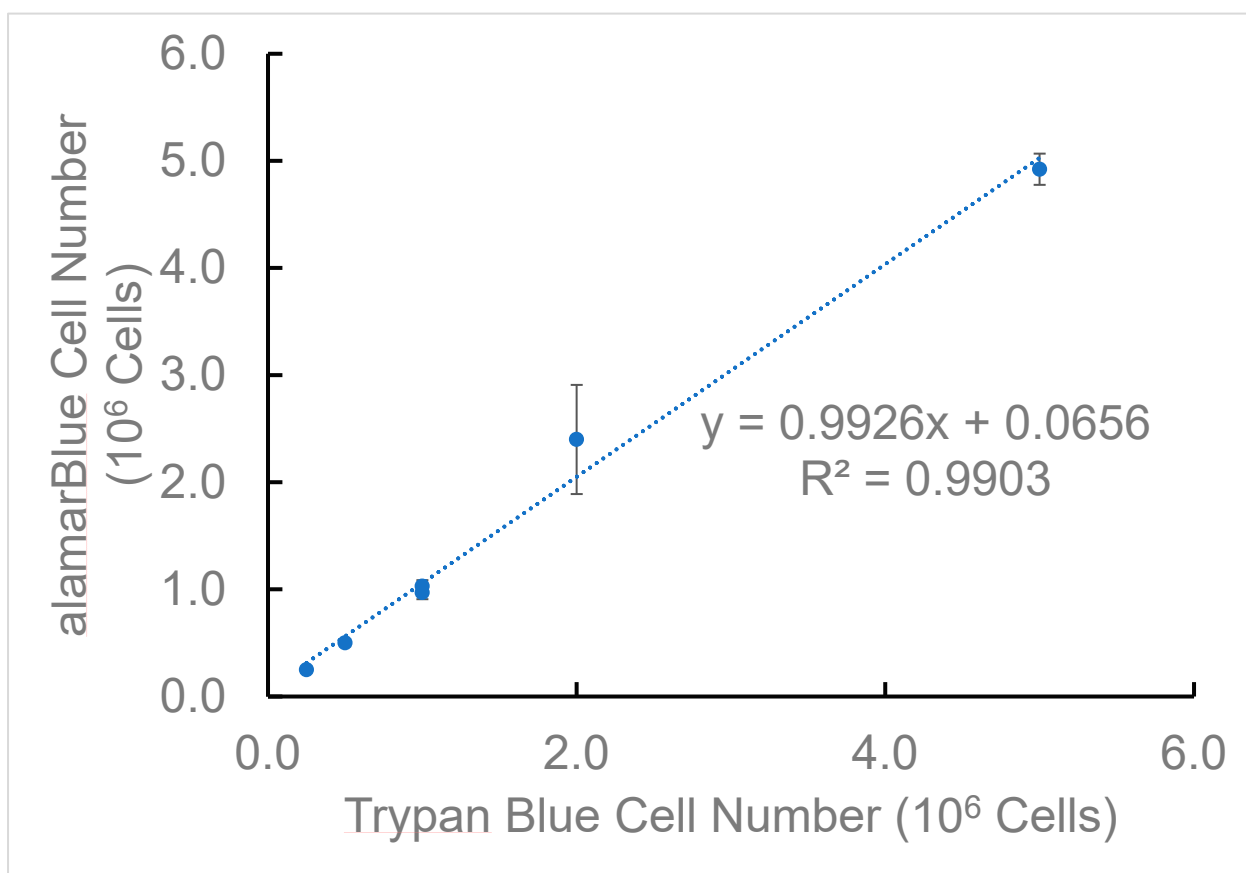

**Figure S2.** Validation of cell number of NIH 3T3 cells in alginate hydrogel microstrands determined by alamarBlue assay with cell counting by trypan blue exclusion assay.

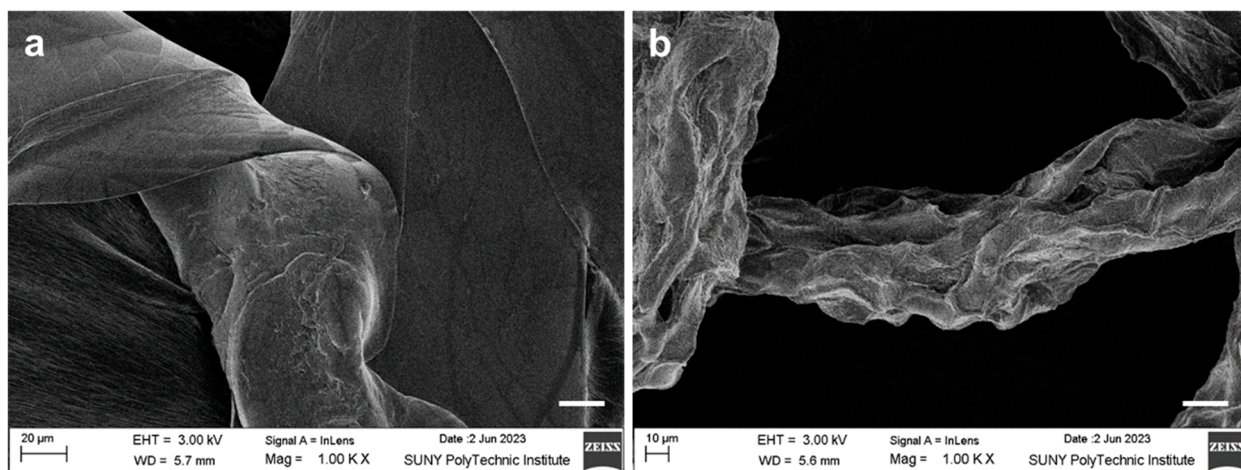

**Figure S3.** SEM images of alginate hydrogel microstrands. (a) Air-dried sample. (b) Lyophilized sample. Scale bar = 20  $\mu\text{m}$ .

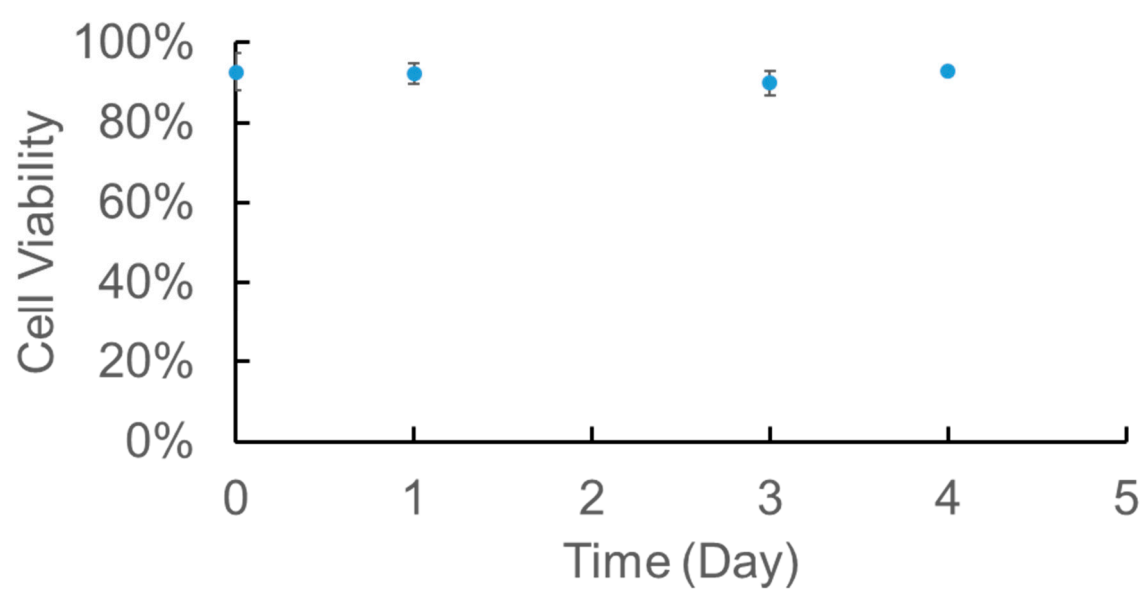

**Figure S4.** Cell viability of NIH 3T3 fibroblasts in alginate hydrogel microstrands.  $1 \times 10^6$  cells encapsulated in 250  $\mu\text{L}$  alginate microstrands and cultured for 4 days.

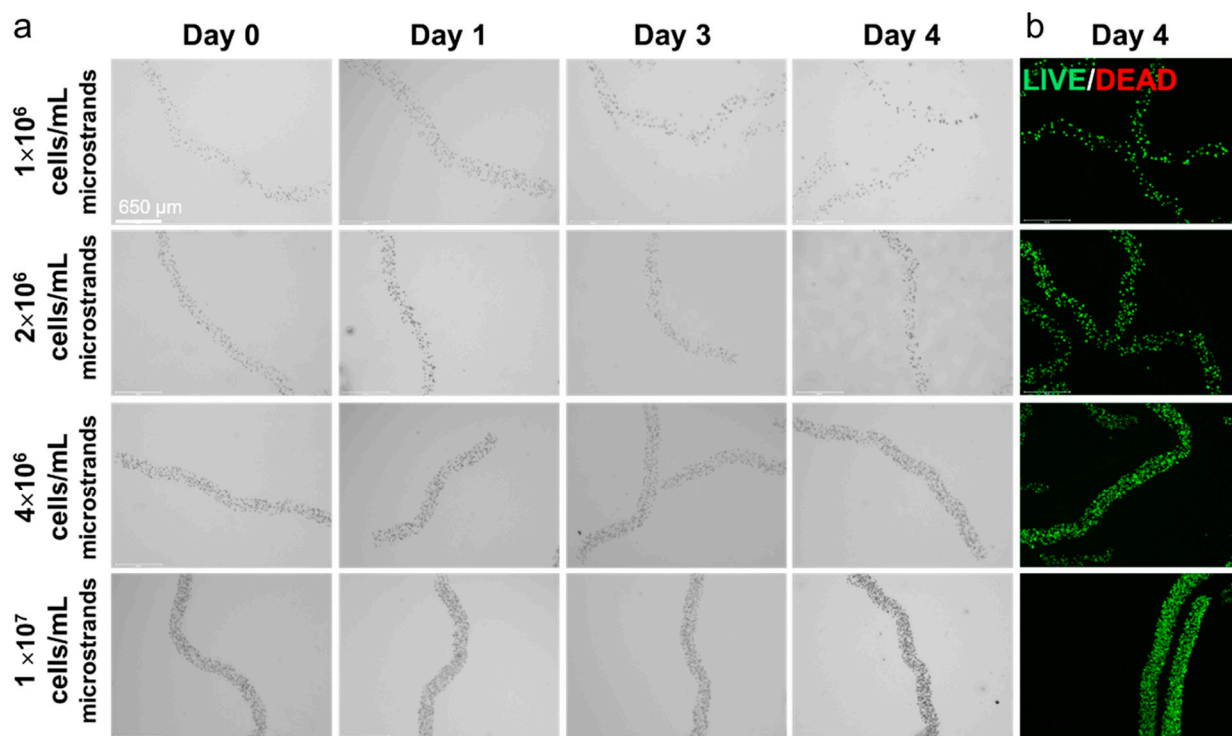

**Figure S5.** Cell growth of NIH 3T3 fibroblasts in alginate hydrogel microstrands for 4 days. (a) Optical images on day 0, 1, 3 and 4. (b) Fluorescence image of LIVE/DEAD stained cells in microstrands on day 4. Green, live cells. Red, dead cells. Scale bar = 650  $\mu\text{m}$ .

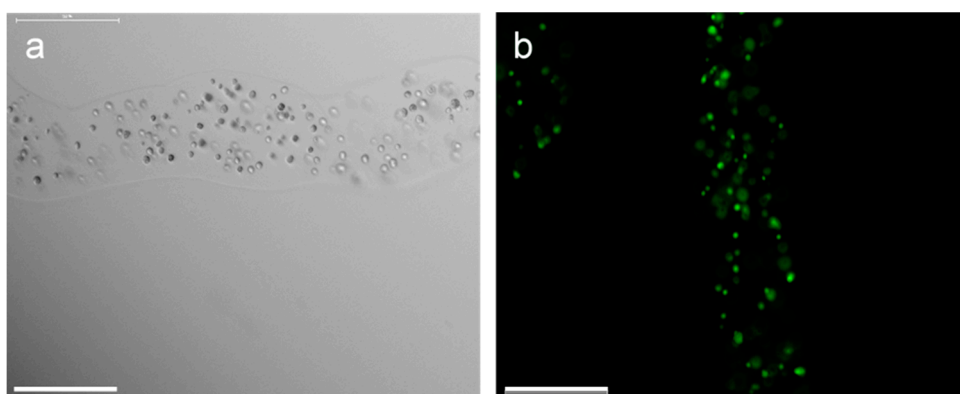

**Figure S6.** Primary E16 mesenchyme cells grown in alginate hydrogel microstrands at an initial cell seeding density of  $4 \times 10^6$  cells/mL alginate for 4 days. (a) Optical image. (b) Fluorescence image of LIVE/DEAD stained cells in microstrands. Green, live cells. Red, dead cells. Scale bar = 275  $\mu\text{m}$ .

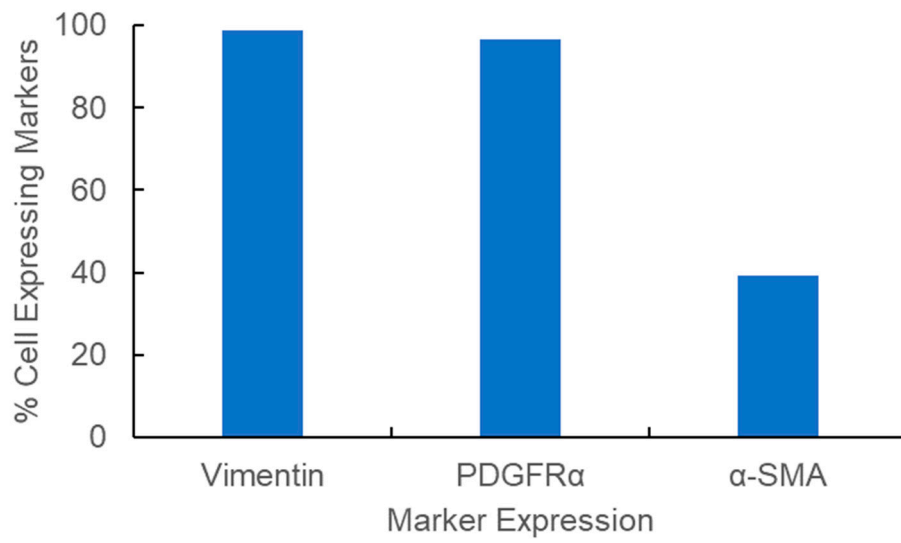

**Figure S7.** Quantification of confocal images of primary E16 mesenchyme cells cultured in microstrands showing more than 96% primary E16 mesenchyme cells express stromal mesenchymal markers, vimentin and PDGFRα while less than 40% cells expressing the myofibroblast marker, α-SMA on day 4.
